# Supplementary material for: Enhancing COVID-19 Vaccines Acceptance: Results from a Survey on Vaccine Hesitancy in Northern Italy
Source: MDPI journal article supplement (doi:10.3390/vaccines9040378), 2021-04-13

# Questionnaire on COVID-19 vaccination hesitancy

## Personal information

Panel information already available:

- Age (years)
- Gender
- Educational level
- Employment status
- Number of family members

**1. Have you got any close family member (father/mother/grandfather/grandmother) older than 70 years?**

- Yes, living together
- Yes, not living together
- No

**2. You would define your family income as...**

- Lower than average
- On average
- Higher than average

**3. Do you have any of the following conditions? [select all that apply]**

- Cancer
- Immunocompromised state due to therapy or disease
- Obesity
- Diabetes (type 1 or 2)
- Cardiovascular disease
- Pulmonary disease
- Rheumatological condition

## Personal experiences

**4. If you have refused a vaccine in the past that was recommended to you by a healthcare worker - what was/were the reason(s)? [check all reasons that applied to that situation]**

- I never refused a vaccine recommended by a healthcare worker
- Did not think it was needed
- Did not have enough information on the vaccine
- Did not think the vaccine was effective
- Did not think the vaccine was safe
- I was concerned about side effects
- I had a bad experience with a previous vaccination
- Did not know where to get vaccination
- Other logistic problems

**5. Have you had COVID-19?**

- I had suspected symptoms but I didn't verify with a doctor and/or specific exams
- No
- Yes with no symptoms
- Yes with mild symptoms
- Yes with severe symptoms

**6. Have you lost your job or had an income reduction due to COVID-19 pandemic?**

- No
- Yes, lost my job or had a salary reduction due to quarantine period
- Yes, lost my job or had a salary reduction due to restriction measures

**7. How concerned are you of ...**

|                                                                                                                                                         | Not at all concerned | A little concerned | Somewhat concerned | Very concerned |
|---------------------------------------------------------------------------------------------------------------------------------------------------------|----------------------|--------------------|--------------------|----------------|
| Contracting COVID-19 at work?<br>(For example: office and other work settings that are not your home)                                                   |                      |                    |                    |                |
| Contracting COVID-19 outside of work?<br>(For example: at the grocery store, when you are using transportation, or in other aspects of your daily life) |                      |                    |                    |                |
| Infecting your family or friends with COVID-19?                                                                                                         |                      |                    |                    |                |

**Vaccination likelihood**

**8. A COVID-19 vaccine has already been approved. If you were offered to get the vaccine in the next months - at no cost for you- how likely are you to take it?**

- Very likely
- Somewhat likely
- I am not sure
- Somewhat unlikely
- Very unlikely
- I would not take it within the next two months but I might reconsider it in the future

**9. What would be important for you to know to make you more confident in the COVID-19 vaccine? [Select up to 3 options]**

- The fast production of the vaccine did not compromise its safety
- Agencies approving the vaccines are following strict rules
- My risk of getting sick with COVID-19 is bigger than the risk of side effects from the vaccine
- The vaccine cannot cause any immediate or long term injury
- It is impossible to get COVID-19 or any other disease from the vaccine itself or its components
- The vaccine works in protecting me from COVID-19
- The vaccine works in stopping the transmission of COVID-19 from one person to another
- Health agencies and WHO recommend the vaccine and agree it is safe
- I do not need any other information
- Other - please specify\_\_\_\_\_

**10. What else would be important for you to know to make you more likely to take the COVID-19 vaccine? [Select up to 3 options]**

- Once vaccinated I will be able to live my life with no restrictions
- Those with concerns about the vaccine have opportunities to share their opinions with the public
- Pharmaceutical companies will not make large profits from the vaccine
- Everybody will have equal access to the vaccine regardless of income or race
- I will be free to choose if I get the vaccine or not with no consequences
- There are no other reasons why so many people are sick (i.e. 5G technology or other unknown reasons)

## Supplementary Results

**Table S1.** Participants' response to questions on perceived risk of infection in the overall sample and in confident and hesitant groups.

|                                                                                    | <b>Overall<br/>(N=1011)</b> | <b>Confident<br/>(N=697)</b> | <b>Hesitant<br/>(N=314)</b> |
|------------------------------------------------------------------------------------|-----------------------------|------------------------------|-----------------------------|
|                                                                                    | N (%)                       | N (%)                        | N (%)                       |
| <b>How concerned are you about contracting COVID-19 at work?</b>                   |                             |                              |                             |
| Not concerned                                                                      | 182 (18.0)                  | 101 (14.5)                   | 81 (25.8)                   |
| A little concerned                                                                 | 308 (30.5)                  | 215 (30.9)                   | 93 (29.6)                   |
| Somewhat concerned                                                                 | 346 (34.2)                  | 256 (36.7)                   | 90 (28.7)                   |
| Very concerned                                                                     | 175 (17.3)                  | 125 (17.9)                   | 50 (15.9)                   |
| <b>How concerned are you about contracting COVID-19 outside of work?</b>           |                             |                              |                             |
| Not concerned                                                                      | 88 (8.7)                    | 39 (5.6)                     | 49 (15.6)                   |
| A little concerned                                                                 | 298 (29.5)                  | 195 (28.0)                   | 103 (32.8)                  |
| Somewhat concerned                                                                 | 434 (42.9)                  | 315 (45.2)                   | 119 (37.9)                  |
| Very concerned                                                                     | 191 (18.9)                  | 148 (21.2)                   | 43 (13.7)                   |
| <b>How concerned are you about infecting your family or friends with COVID-19?</b> |                             |                              |                             |
| Not concerned                                                                      | 56 (5.5)                    | 25 (3.6)                     | 31 (9.9)                    |
| A little concerned                                                                 | 151 (14.9)                  | 86 (12.3)                    | 65 (20.7)                   |
| Somewhat concerned                                                                 | 376 (37.2)                  | 259 (37.2)                   | 117 (37.3)                  |
| Very concerned                                                                     | 428 (42.3)                  | 327 (46.9)                   | 101 (32.2)                  |

**Table S2.** Motivations needed to increase confidence in the COVID-19 vaccine: frequency of reporting in hesitant group (N=314).

|                                                                                                    | N (%)             |
|----------------------------------------------------------------------------------------------------|-------------------|
| <b>Specific motivations about vaccine</b>                                                          |                   |
| The vaccine cannot cause any immediate or long-term injury                                         | <b>170 (54.1)</b> |
| The vaccine works in protecting me from COVID-19                                                   | <b>84 (26.8)</b>  |
| The fast production of the vaccine did not compromise its safety                                   | <b>82 (26.1)</b>  |
| The vaccine works in stopping the transmission of COVID-19 from one person to another              | 51 (16.2)         |
| My risk of getting sick with COVID-19 is bigger than the risk of side effects from the vaccines    | 51 (16.2)         |
| I do not need other information                                                                    | 46 (14.7)         |
| Agencies approving the vaccines are following strict rules                                         | 41 (13.1)         |
| It's impossible to get the COVID-19 or any other disease from the vaccine itself or its components | 37 (11.8)         |
| Health agencies such as WHO recommended the vaccine and say it is safe                             | 22 (7.0)          |
| Other                                                                                              | 8 (2.6)           |
| <b>Other motivations</b>                                                                           |                   |
| I will be free to choose if I get the vaccine or not with no consequences                          | <b>172 (54.8)</b> |
| Once vaccinated I will be able to live my life with no restrictions                                | <b>146 (46.5)</b> |
| Everybody will have equal access to the vaccination regardless of income and race                  | 80 (25.5)         |
| Pharmaceutical companies will not make large profits from the vaccine                              | 71 (22.6)         |
| Those with concerns about the vaccine have the opportunity to share their opinion with the public  | 44 (14.0)         |
| There are no other reasons why so many people are sick (i.e. 5G technology, other unknown reasons) | 13 (4.1)          |

**Figure S1.** Classification tree showing subgroups with different levels of COVID-19 vaccine hesitancy.

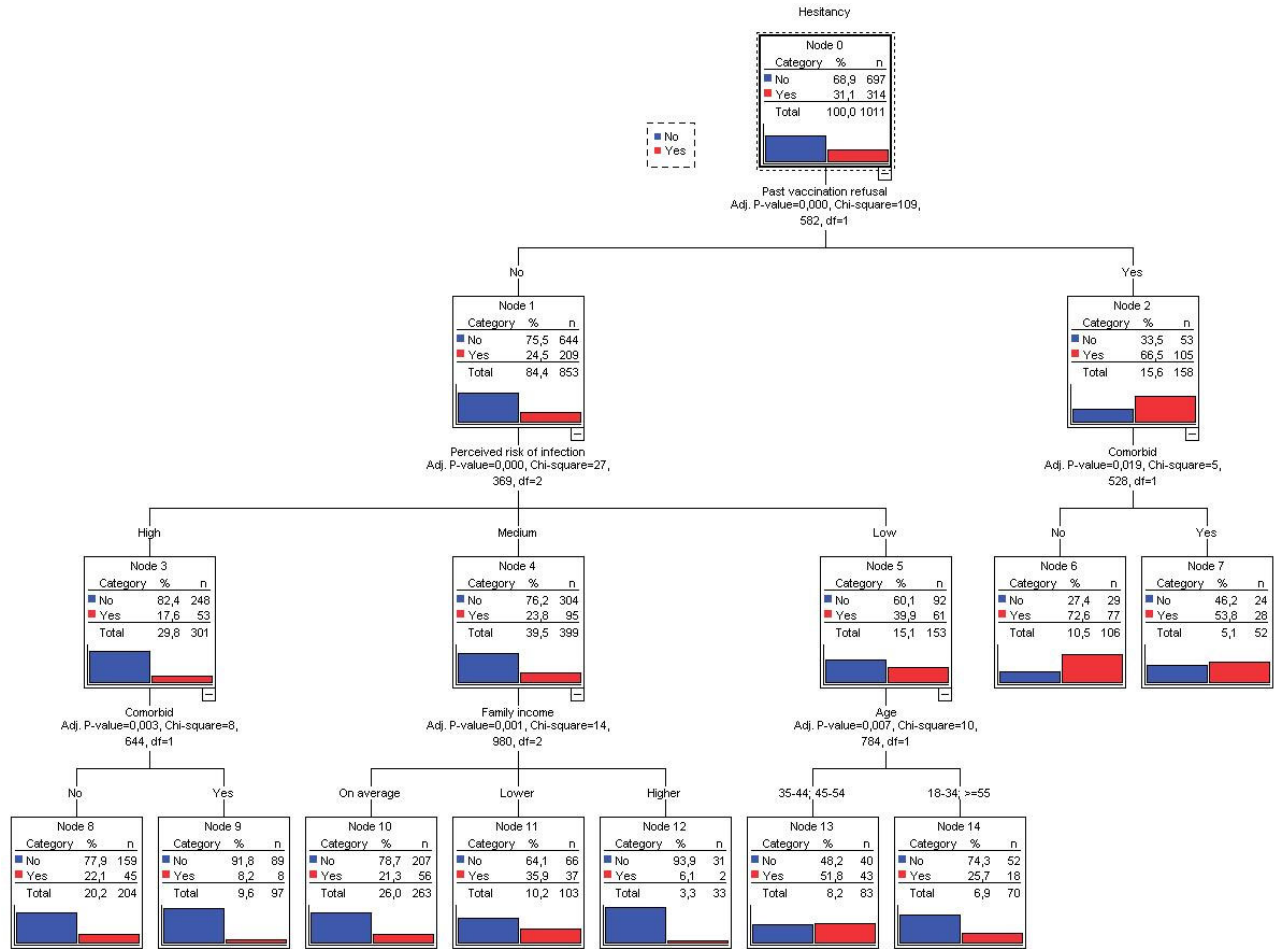

Supplement: s1 [file s1]
